# Supplementary material for: Myxococcus xanthus Encapsulin as a Promising Platform for Intracellular Protein Delivery
Source: MDPI journal article supplement (doi:10.3390/ijms232415591), 2022-12-09
Supplement: s1 [file s1]

Video\_S1 Photoactivation of encapsulated PAmCherry label in 293T EncA\_PAmCherry cells during simultaneous irradiation with 405 nm and 561 nm lasers.

Video\_S2 No photoactivation occurs in control (non-transduced) 293T cells. Plot of fluorescence intensity (Y axis, a.u.) vs. time (X axis, s)

Video\_S3 Photoactivation of encapsulated PAmCherry label in 293T EncA\_PAmCherry cells during simultaneous irradiation with 405 nm and 561 nm lasers. Plot of fluorescence intensity (Y axis, a.u.) vs. time (X axis, s).
